# Supplementary material
Source: bioRxiv or medRxiv preprint supplement (https://medrxiv.org/highwire/filestream/79878/field_highwire_adjunct_files/1/2020.05.04.20091017-2.pdf)
Supplement: Supplementary file [file 2020.05.04.20091017-2.pdf]

## **Supplementary file 2: Psychosocial strain mitigation strategy**

The present results suggest that global health approach to mitigate the psychosocial strain during the COVID-19 outbreak would benefit from the following crisis-oriented interdisciplinary strategy:

- 1<sup>st</sup> step: Implementing a national survey based on expert-knowledge domain (e.g., ECLB-COVID19) to provide rigorous scientific identification of risk factors for psychosocial strain during the COVID-19 crisis and to understand the specific needs of the population.

- 2<sup>nd</sup> step: Developing a “Needs-oriented” intervention targeting the identified psychosocial and behavioral risk factors.

- 3<sup>rd</sup> step: Promoting physical activity and encouraging “technology-use behavior” to facilitate the remote delivery of the developed crisis-oriented interventions.

- 4<sup>th</sup> step: Providing an affordable user-friendly ICT-based COMPANION for the COVID-19 lockdown which is able to (i) deliver the multi-dimension survey, (ii) identifying the psychosocial and behavioral disorders and risk factors and (iii) deliver the “Needs-oriented” recommendations.

This innovative solution would aim to foster an Active and Healthy Confinement Lifestyle (AHCL) during the pandemic period by mitigating the unwanted psychosocial strain triggered by the lockdown. Additionally, this smart recommendation/assistant system would help to minimize the unprecedented pressure on the helpline center during the crisis period and via tracking contacts and symptoms identification technology would help also to foster the distancing strategy.

***Funding request:*** Our international cross-disciplinary ECLB-COVID19 consortium would like to take the initiative to develop this ICT-COVID19-COMPANION. However, rapid funding is required to cover the direct and indirect costs to facilitate the work and expedite the implementation process.
